# Supplementary material for: Naked-eye detection of Cys using simple molecular systems of curcumin and Hg2+
Source: Royal Society of Chemistry journal article supplement (doi:10.1039/c3ay40550h), 2013-01-01
Supplement: c3ay40550h.pdf [file c3ay40550h.pdf]

## **Naked-eye Detection of Cys Using Simple Molecular Systems of Curcumin and Hg<sup>2+</sup>**

Fenghua Geng, Yongxiang Wang\*, Peng Qu, Yintang Zhang, Hui Dong, Maotian Xu\*

Henan Key Laboratory Cultivation Base of Nanobiological Analytical Chemistry, College of  
Chemistry and Chemical Engineering, Shangqiu Normal University, Shangqiu, 476000, China

---

Correspondence to Associate Prof. Dr. Wang Y. X. Email: wangyx2006@pku.edu.cn and Prof. Dr. Xu, M. T. Phn  
+86-370-2595593. Fax: +86-370-2594306. Email: xumaotian@sqnc.edu.cn

**Figure S1**, UV-Vis titration of Cur-Hg<sup>2+</sup> ensemble in regular organic solvents (DMF, DMSO, acetonitrile and ethanol) solutions with the volume ration of organic solvent to water fixed at 7:3.

**Figure S2** shows the sensing system shows best sensitivity when the ratio of acetonitrile and HEPES is 7:3 (v/v).

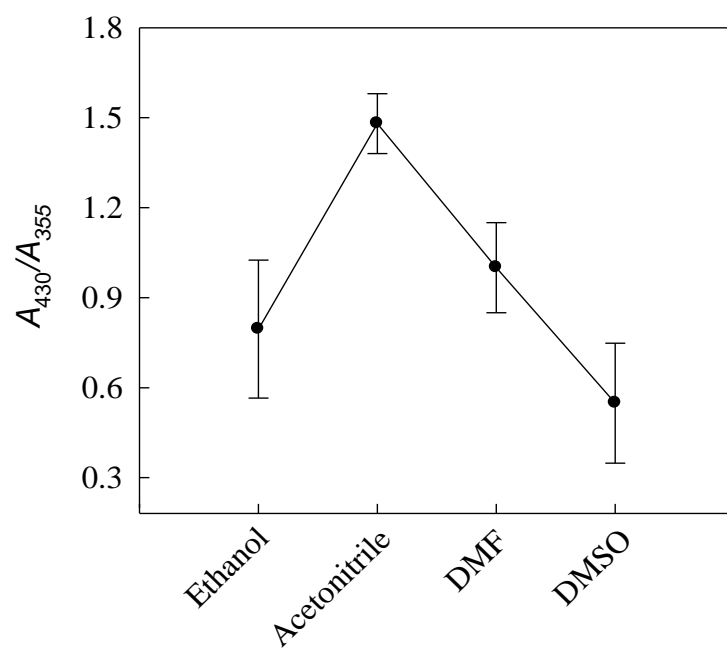

Figure S1

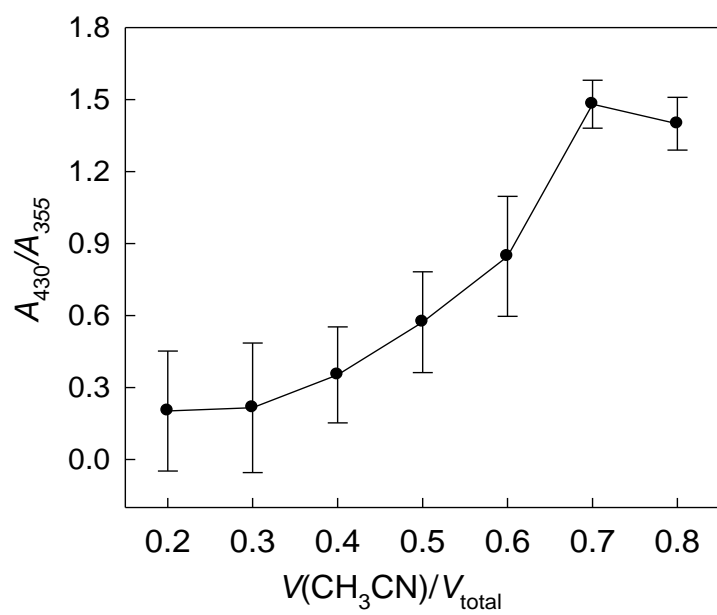

Figure S2
